# Supplementary material
Source: PubMed Central journal article supplement (PMC5783762)
Supplement: NIHMS906105-supplement.pdf [file NIHMS906105-supplement.pdf]

**Appendix**  
**Blood Lead Levels and Dental Caries in U.S. Children Who Do Not Drink Tap Water**  
**Sanders and Slade**

**Appendix Table 1.** Age-Stratified Associations of Tap Water Consumption With Blood Lead Levels and Dental Caries Experience<sup>a</sup>

| Characteristics          | Blood lead level<br>≥3 µg/dL | <i>p</i> -<br>value | ≥1 Teeth with<br>dental caries | <i>p</i> -value |
|--------------------------|------------------------------|---------------------|--------------------------------|-----------------|
| <b>2–5 years</b>         |                              |                     |                                |                 |
| Drinks tap water         | 194 (6.9)                    | <b>0.012</b>        | 260 (20.5)                     | <b>0.003</b>    |
| Does not drink tap water | 53 (4.0)                     |                     | 118 (31.8)                     |                 |
| All                      | 247 (6.3)                    |                     | 378 (22.5)                     |                 |
| <b>6–11 years</b>        |                              |                     |                                |                 |
| Drinks tap water         | 140 (2.8)                    | 0.647               | 914 (53.1)                     | 0.069           |
| Does not drink tap water | 23 (2.4)                     |                     | 265 (63.1)                     |                 |
| All                      | 163 (2.8)                    |                     | 1,179 (54.7)                   |                 |
| <b>12–19 years</b>       |                              |                     |                                |                 |
| Drinks tap water         | 79 (1.5)                     | 0.803               | 1,045 (59.2)                   | 0.188           |
| Does not drink tap water | 18 (1.3)                     |                     | 172 (65.9)                     |                 |
| All                      | 97 (1.5)                     |                     | 1,217 (59.8)                   |                 |

Notes: Data are presented as unweighted n (weighted %).

<sup>a</sup>Blood lead levels are from NHANES 2005–2010 and dental caries data are from NHANES 2011–2014.

NHANES, National Health and Nutrition Examination Survey

**Appendix**  
**Blood Lead Levels and Dental Caries in U.S. Children Who Do Not Drink Tap Water**  
**Sanders and Slade**

**Appendix Table 2.** Average Consumption of Bottled Water Among Children who Do and Do Not Drink Tap Water

| Characteristics                       | Drinks tap water (n=33,009) |            |         | Does not drink tap water (n=9,577) |              |         |
|---------------------------------------|-----------------------------|------------|---------|------------------------------------|--------------|---------|
|                                       | Mean                        | 95% CL     | p-value | Mean                               | 95% CL       | p-value |
| Total bottled water intake (ml)       | 4.24                        | 3.98, 4.51 |         | 12.04                              | 11.35, 12.72 |         |
| <b>Sex</b>                            |                             |            |         |                                    |              |         |
| Male                                  | 3.91                        | 3.61, 4.21 | <0.001  | 11.43                              | 10.61, 12.25 | 0.025   |
| Female                                | 4.58                        | 4.27, 4.90 |         | 12.53                              | 11.68, 13.38 |         |
| <b>Age group, years</b>               |                             |            |         |                                    |              |         |
| 2–5                                   | 4.98                        | 4.27, 5.68 |         | 17.98                              | 15.74, 20.23 | <0.001  |
| 6–12                                  | 4.10                        | 3.58, 4.62 |         | 11.25                              | 9.86, 12.64  |         |
| 13–19                                 | 5.21                        | 4.55, 5.86 |         | 10.56                              | 8.94, 12.18  |         |
| <b>Race/ethnicity</b>                 |                             |            |         |                                    |              |         |
| Mexican American                      | 6.64                        | 5.98, 7.31 | <0.001  | 12.57                              | 11.59, 13.55 | 0.002   |
| Other Hispanic                        | 5.85                        | 4.99, 6.71 |         | 14.77                              | 12.85, 16.69 |         |
| Non-Hispanic white                    | 3.72                        | 3.46, 3.99 |         | 11.21                              | 10.09, 12.33 |         |
| Non-Hispanic black                    | 4.89                        | 4.50, 5.27 |         | 11.14                              | 10.38, 11.90 |         |
| Other/Multiple                        | 4.95                        | 4.27, 5.64 |         | 13.93                              | 12.35, 15.52 |         |
| <b>Family income-to-poverty ratio</b> |                             |            |         |                                    |              |         |
| <1 (below poverty threshold)          | 4.36                        | 3.94, 4.78 | 0.087   | 11.19                              | 10.34, 12.03 | 0.089   |
| 1 to <2.5 (near poverty)              | 3.96                        | 3.62, 4.29 |         | 12.00                              | 10.99, 13.01 |         |
| 2.5 to <5 (not poor)                  | 4.11                        | 3.70, 4.53 |         | 12.79                              | 11.23, 14.35 |         |
| 5 (500% above threshold)              | 4.50                        | 4.02, 4.99 |         | 12.74                              | 10.76, 14.72 |         |
| Income not reported                   | 4.92                        | 4.12, 5.73 |         | 11.30                              | 9.43, 13.16  |         |
| <b>NHANES cycle</b>                   |                             |            |         |                                    |              |         |
| 2005–2006                             | 3.98                        | 3.59, 4.38 | 0.458   | 11.77                              | 9.95, 13.60  | 0.085   |
| 2007–2008                             | 4.31                        | 3.64, 4.98 |         | 10.61                              | 9.10, 12.11  |         |
| 2009–2010                             | 4.24                        | 3.67, 4.81 |         | 11.59                              | 10.60, 12.59 |         |
| 2011–2012                             | 3.98                        | 3.32, 4.64 |         | 14.00                              | 12.09, 15.92 |         |
| 2013–2014                             | 4.68                        | 4.02, 5.34 |         | 12.33                              | 11.37, 13.29 |         |

*Notes:* Mean total bottled water drank the previous day (ml) per kilogram body weight, stratified according to whether or not participants drink tap water, 2005–2014 National Health and Nutrition Examination Survey (NHANES) (n=42,586). Differences tested for statistical significance using Pearson Chi-square test.

CL, confidence limit

**Appendix**  
**Blood Lead Levels and Dental Caries in U.S. Children Who Do Not Drink Tap Water**  
**Sanders and Slade**

**Appendix Table 3.** Prevalence Ratios<sup>a,b</sup> of Elevated Blood Lead Level ( $\geq 5$   $\mu\text{g/dL}$ )

| Characteristics                       | Prevalence ratio (95% CL) |
|---------------------------------------|---------------------------|
| <b>Tap water consumption</b>          |                           |
| Drinks tap water                      | ref                       |
| Does not drink tap water              | 0.57 (0.34, 0.93)         |
| <b>NHANES cycle</b>                   |                           |
| 2005–2006                             | 1.00                      |
| 2007–2008                             | 0.87 (0.34, 2.20)         |
| 2009–2010                             | 0.40 (0.19, 0.86)         |
| 2011–2012                             | 0.49 (0.18, 1.33)         |
| 2013–2014                             | 0.40 (0.11, 1.41)         |
| Age in years                          | 0.87 (0.81, 0.95)         |
| <b>Sex</b>                            |                           |
| Male                                  | ref                       |
| Female                                | 0.57 (0.39, 0.83)         |
| <b>Race/ethnicity</b>                 |                           |
| Mexican American                      | 0.60 (0.27, 1.36)         |
| Other Hispanic                        | 0.71 (0.24, 2.13)         |
| Non-Hispanic white                    | 1.00                      |
| Non-Hispanic black                    | 1.50 (0.78, 2.87)         |
| Other/Multiple                        | 0.21 (0.07, 0.64)         |
| <b>Family income to poverty ratio</b> |                           |
| <1 (below poverty threshold)          | 55.14 (8.89, 342.14)      |
| 1 to <2.5 (near poverty)              | 24.56 (4.09, 147.36)      |
| 2.5 to <5                             | 21.60 (3.25, 143.44)      |
| 5 (500% above threshold)              | ref                       |
| Income not reported                   | 39.87 (5.80, 274.23)      |
| Intercept                             | 0.00 (0.00, 0.01)         |

<sup>a</sup>Values are from a multivariable generalized linear model.

<sup>b</sup>U.S. population aged 2–19 years, 2005–2014 National Health and Nutrition Examination Survey (NHANES) (n=12,373)

CL, confidence limit

**Appendix**  
**Blood Lead Levels and Dental Caries in U.S. Children Who Do Not Drink Tap Water**  
**Sanders and Slade**

**Appendix Table 4.** Adjusted Prevalence Ratios<sup>a,b</sup> of Elevated Blood Lead Level ( $\geq 3$   $\mu\text{g/dL}$ )  
Adjusted for House Age

| Characteristics                       | Prevalence ratio (95% CL) |
|---------------------------------------|---------------------------|
| <b>Tap water consumption</b>          |                           |
| Drinks tap water                      | ref                       |
| Does not drink tap water              | 0.50 (0.28, 0.89)         |
| <b>Year home was built</b>            |                           |
| In 1978 or more recently              | ref                       |
| Before 1978                           | 2.30 (1.23, 4.29)         |
| Age in years                          | 0.86 (0.82, 0.91)         |
| <b>Sex</b>                            |                           |
| Male                                  | ref                       |
| Female                                | 0.55 (0.34, 0.90)         |
| <b>Race/ethnicity</b>                 |                           |
| Mexican American                      | 0.93 (0.50, 1.72)         |
| Other Hispanic                        | 1.52 (0.65, 3.59)         |
| Non-Hispanic white                    | ref                       |
| Non-Hispanic black                    | 2.03 (1.10, 3.76)         |
| Other/Multiple                        | 0.61 (0.29, 1.27)         |
| <b>Family income to poverty ratio</b> |                           |
| <1 (below poverty threshold)          | 2.30 (0.97, 5.45)         |
| 1 to <2.5 (near poverty)              | 1.45 (0.58, 3.63)         |
| 2.5 to <5                             | 1.14 (0.44, 2.97)         |
| 5 (500% above threshold)              | ref                       |
| Income not reported                   | 0.60 (0.17, 2.09)         |
| Intercept                             | 0.06 (0.02, 0.15)         |

<sup>a</sup>Values are from a multivariable generalized linear model.

<sup>b</sup>U.S. population aged 2–19 years, 2005–2014 National Health and Nutrition Examination Survey (NHANES) (n=12,373).

CL, confidence limit

**Appendix**  
**Blood Lead Levels and Dental Caries in U.S. Children Who Do Not Drink Tap Water**  
**Sanders and Slade**

**Appendix Table 5.** Adjusted Prevalence Ratios<sup>a,b</sup> of Dental Caries Experience Adjusted for 24-hour Sugar-Sweetened Beverage Consumption

| Characteristics                                       | Prevalence ratio (95% CL) |
|-------------------------------------------------------|---------------------------|
| <b>Tap water consumption</b>                          |                           |
| Drinks tap water                                      | ref                       |
| Does not drink tap water                              | 1.12 (1.02, 1.22)         |
| Age in years                                          | 1.05 (1.05, 1.06)         |
| <b>Sex</b>                                            |                           |
| Male                                                  | ref                       |
| Female                                                | 0.97 (0.89, 1.06)         |
| <b>Race/ethnicity</b>                                 |                           |
| Mexican American                                      | 1.17 (1.03, 1.32)         |
| Other Hispanic                                        | 0.94 (0.82, 1.07)         |
| Non-Hispanic white                                    | ref                       |
| Non-Hispanic black                                    | 0.99 (0.90, 1.09)         |
| Other/Multiple                                        | 1.00 (0.87, 1.16)         |
| <b>Family income to poverty ratio</b>                 |                           |
| <1 (below poverty threshold)                          | 1.48 (1.10, 1.97)         |
| 1 to <2.5 (near poverty)                              | 1.36 (1.06, 1.74)         |
| 2.5 to <5                                             | 1.15 (0.87, 1.53)         |
| 5 (500% above threshold)                              | ref                       |
| Income not reported                                   | 1.34 (0.97, 1.85)         |
| Sugar-sweetened beverage consumption (per 1,000 kcal) | 1.42 (1.19, 1.69)         |
| Intercept                                             | 0.20 (0.16, 0.26)         |

<sup>a</sup>Values are from a multivariable generalized linear model.

<sup>b</sup>U.S. population aged 2–19 years, 2011–2014 National Health and Nutrition Examination Survey (n= 5,585).

CL, confidence limit
